# Supplementary material
Source: Springer Nature journal article supplement (https://www.springermedizin.de/resource/supplementary/12935_2012_339_MOESM1_ESM.pdf/9540362)

**A**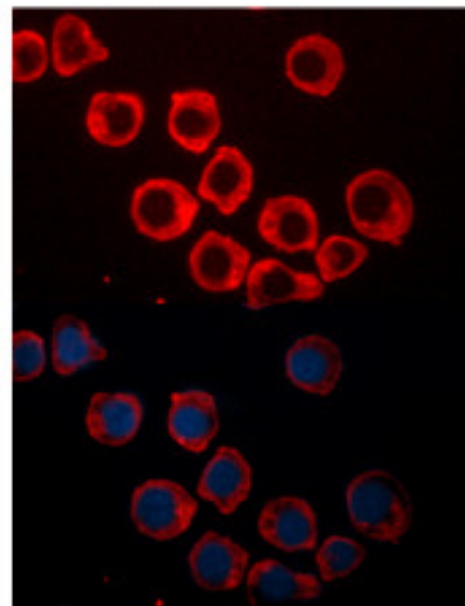**B**0.1  $\mu$ M IM1  $\mu$ M IM

IR-K562

Control

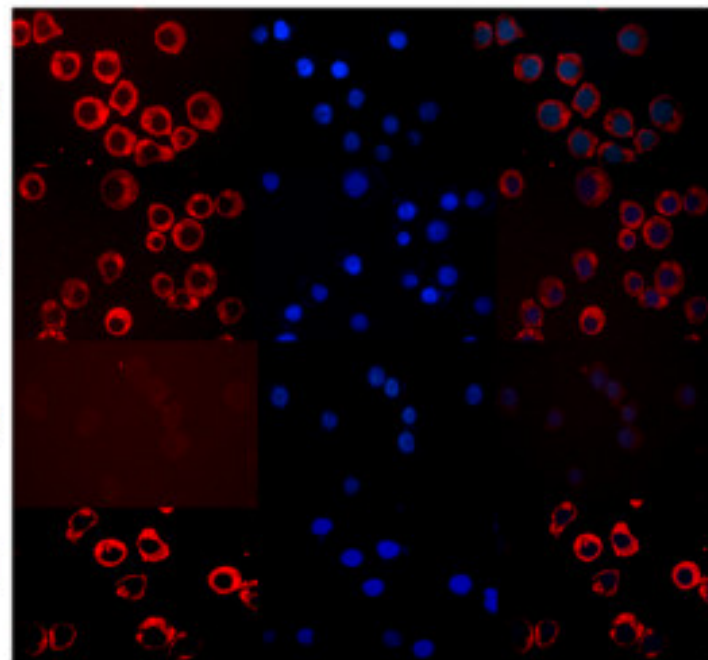

Kaiso

DAPI

Merge

**C**

Untreated

siRNA-p120ctn

0.1  $\mu$ M IM1  $\mu$ M IM

IR-K562

siRNA-Kaiso

Kaiso

B-tubulin

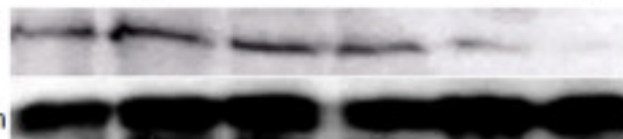**D**

K562

IR-K562

C

N

C

N

Kaiso

B-tubulin

97KDa

50KDa

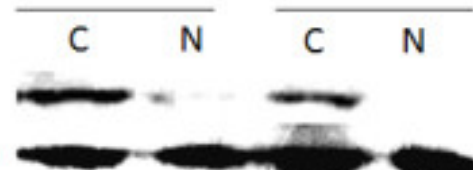

Supplement: MOESM1 [file 9540362]
